# Supplementary material for: NOXA genetic amplification or pharmacologic induction primes lymphoma cells to BCL2 inhibitor-induced cell death
Source: PubMed Central journal article supplement (PMC6255185; doi:10.1073/pnas.1806928115), 2018-11-07
Supplement: pnas.1806928115.sapp.pdf [file pnas.1806928115.sapp.pdf]

# Supplementary Figure 1

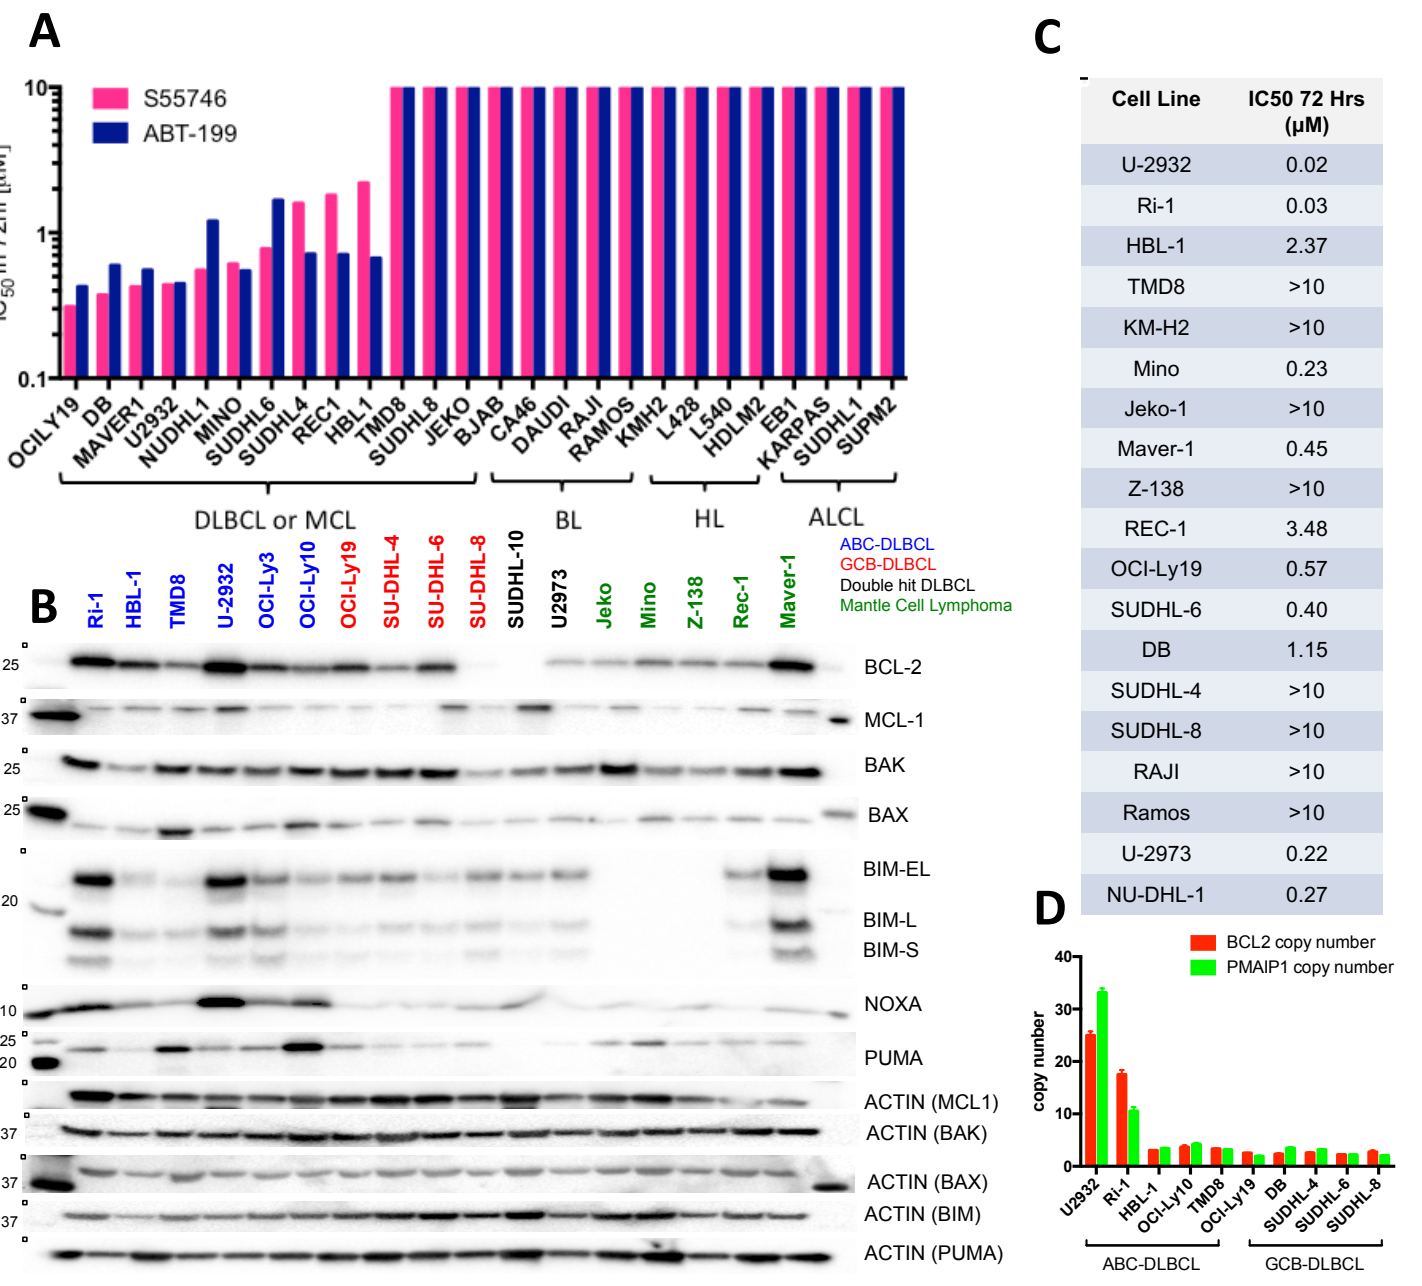

**Figure S1. BCL-2 expression is required but not sufficient to predict sensitivity to BCL2 inhibitors**

(A) Bar graph showing 3-day  $IC_{50}$  values in B-cell lymphoma cell lines ( $n=26$ ), treated with either S-55746 or ABT-199/venetoclax in a logarithmic scale. Results are from a high-throughput screening assay of single agent dose response. DLBCL, diffuse large B cell lymphoma; MCL, mantle cell lymphoma; BL, Burkitt lymphoma; HL, Hodgkin lymphoma; ALCL, anaplastic large cell lymphoma.

(B) Western blot analysis showing baseline expression levels of BCL2 family proteins (Bcl-2, Bcl-xL, Bax, Bak, Mcl-1, Noxa, Puma and Bim). Cells are color-coded by tumor-types.

(C) Table summarizing the S55746  $IC_{50}$  concentrations at 72 hours for the 19 cell lines shown in Fig 1A.

(D) BCL2 (red) and PMAIP1/NOXA (green) copy numbers in 10 DLBCL cell lines, as determined by a copy number PCR assay

Supplementary Figure 2

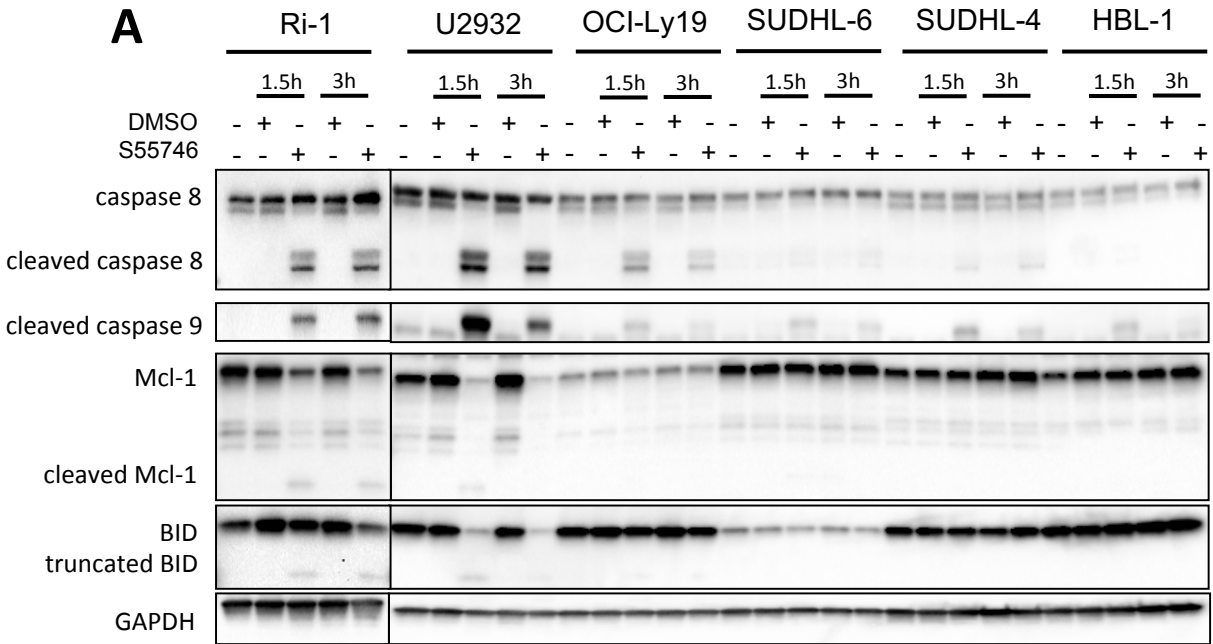

**Figure S2. In vitro efficacy of the BCL2 inhibitor S55746 in cell lines harboring NOXA/BCL2 gene amplification.**

(A) Western blot showing that sensitivity to S55746 in Ri-1 and U2932 cells is associated with, activation of caspase 8, 9 and depletion of MCL1 protein

## Supplementary Figure 3

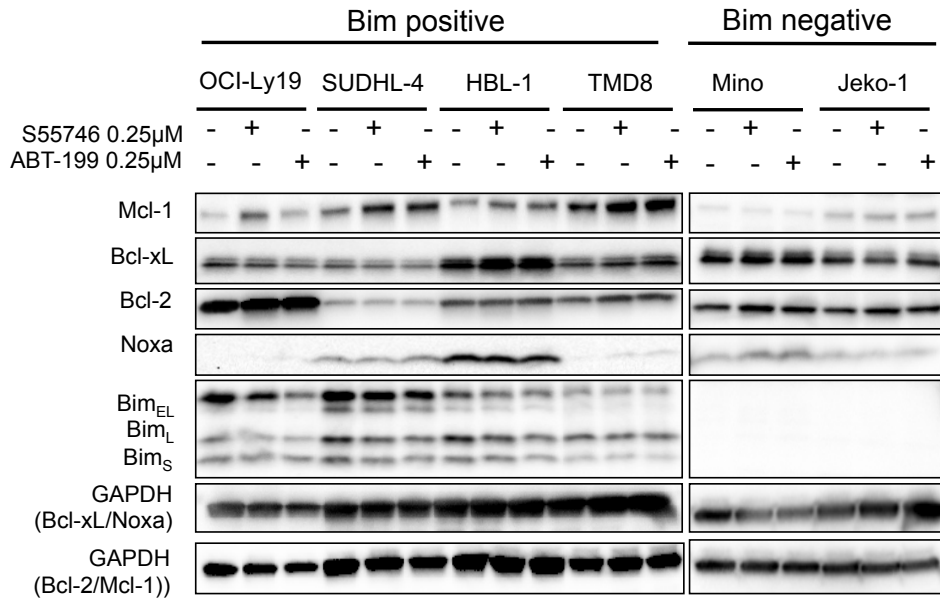

### Figure S3. BCL2 inhibitors induce an increase in MCL-1 levels in Bim positive cell lines

Western blot analysis showing the effect of BCL2 inhibitors S-55746 and ABT-199/venetoclax (0.25 μM for 24 hours) on Bcl2 family proteins in Bim positive and Bim negative cell lines.

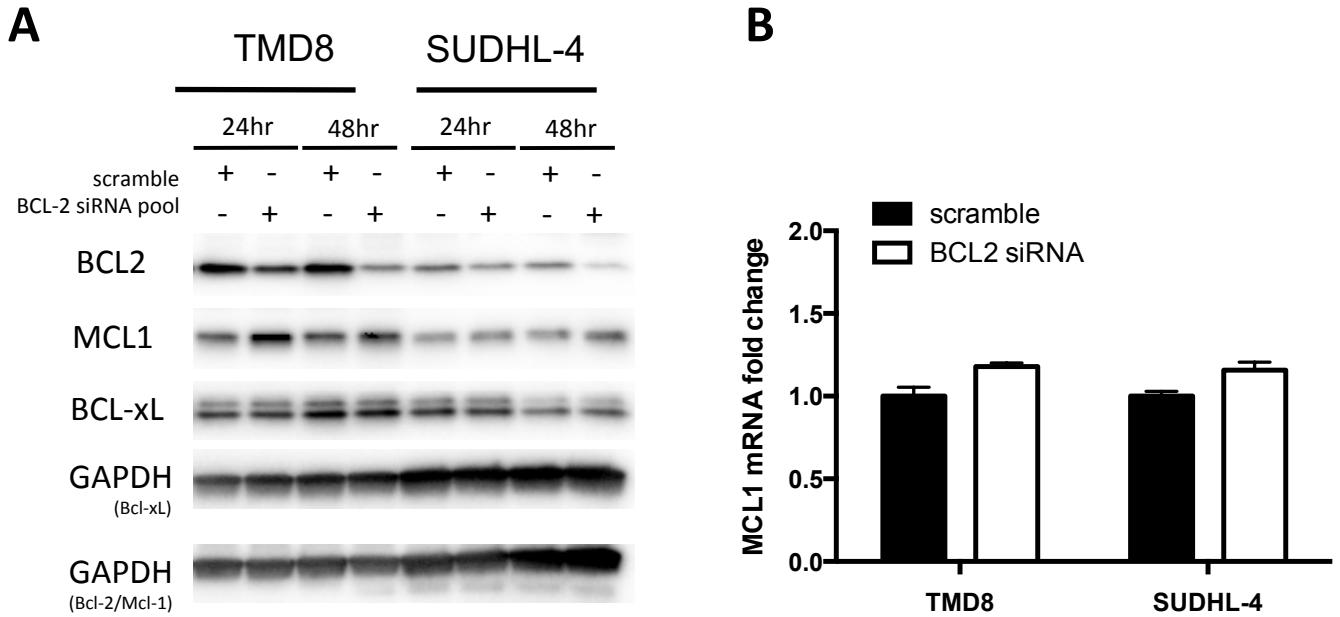

**Figure S4. BCL2 gene silencing is associated with an increase in MCL1 protein abundance in DLBCL**

- A. Western blot analysis showing the effect of BCL2 depletion by RNA interference on MCL1 and BCL2, and BCL-xL in 2 representative lines (TMD8 and SUDHL-4). Cells were transfected either with scramble siRNA or BCL2 siRNA for the indicated time.
- B. BCL2 gene silencing had no significant effect on the mRNA levels of MCL1 in TMD8 and SUDHL-4

# Supplementary Figure 5

## A

TMD8

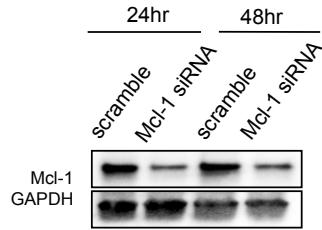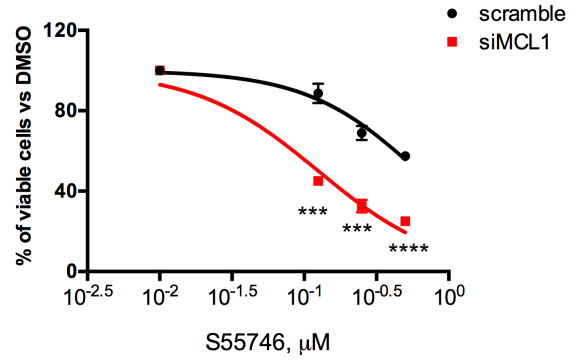

HBL-1

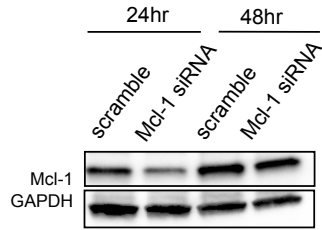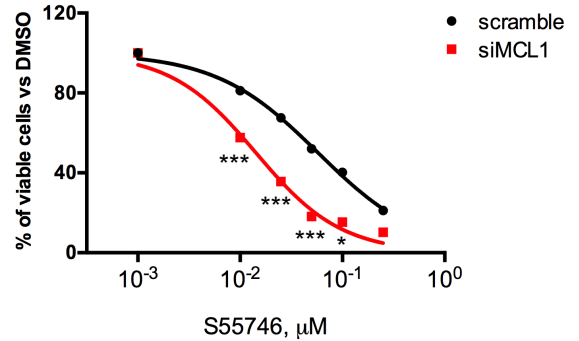

## B

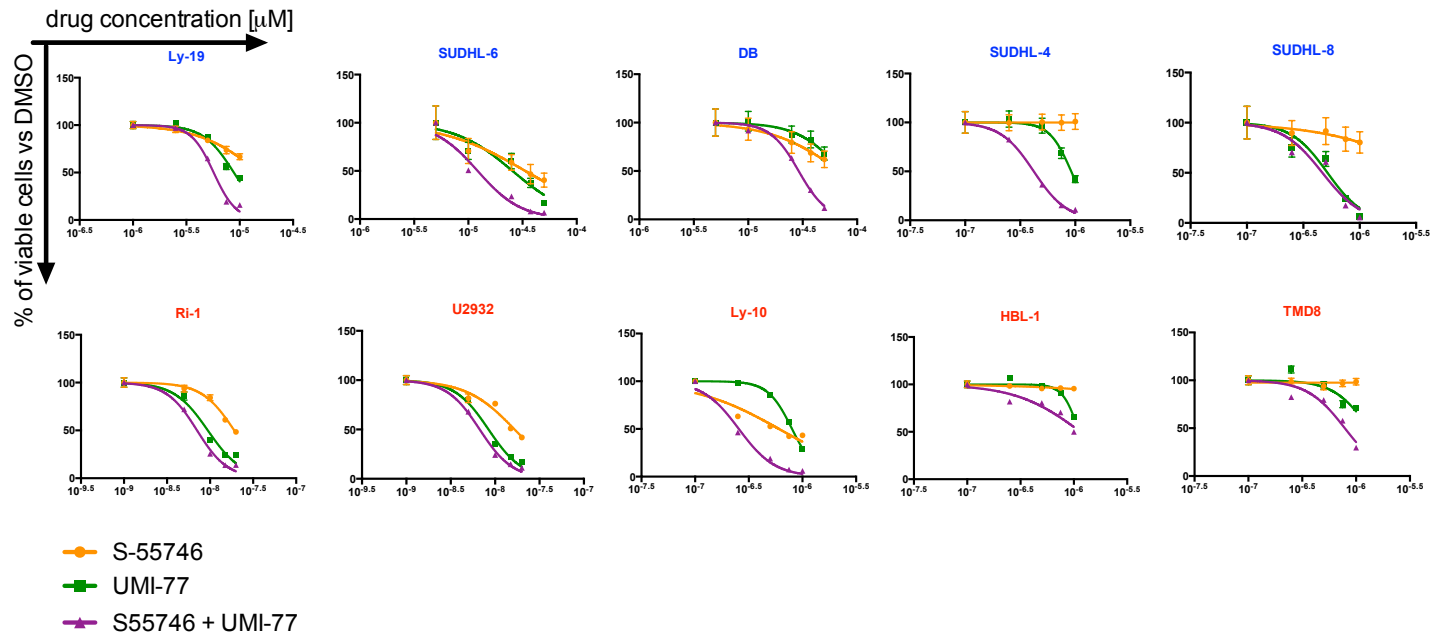

**Figure S5. MCL1 gene silencing or functional inhibition enhances sensitivity to BCL2 inhibitors**

A. Cells were transfected either with scramble siRNA or MCL1 siRNA for the indicated time. Western blot confirming MCL1 depletion by RNA interference in 2 representative lines (TMD8 and HBL-1). MTS assay of cells transfected with scramble or MCL1 siRNA treated with different doses of S-55746 for 24h.

B. MTS assay confirming enhanced antiproliferative effect of BCL2 inhibitor S-55746 in combination with MCL-1 inhibitor UMI-77 in DLBCL cell lines. Cells were treated with increasing concentrations of S-55746 in the presence or absence of increasing concentration of UMI-77 for 48 hrs. All data points represent the means of triplicate experiments, with error bars indicating the S.E.M.

**A**

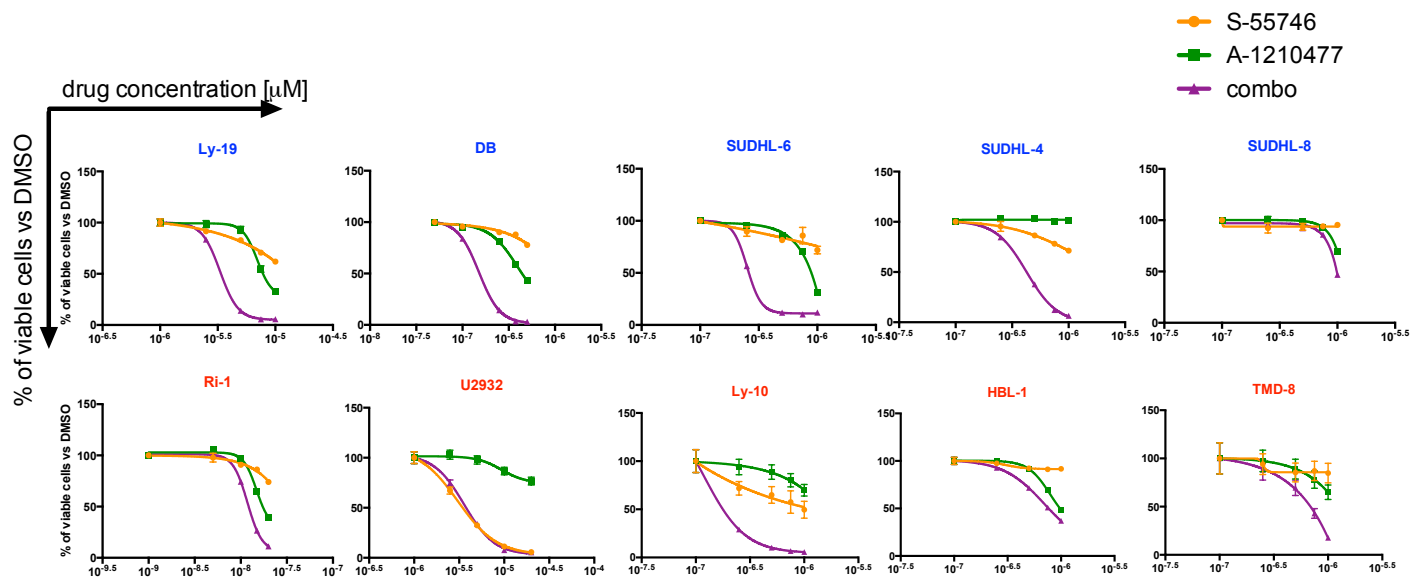

**B**

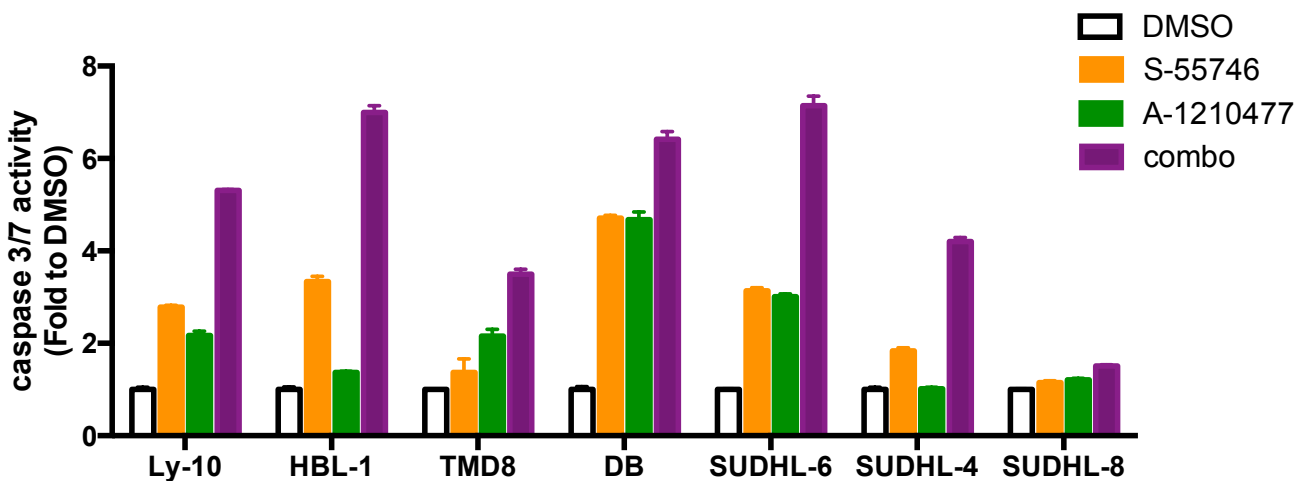

**Figure S6. MCL-1 small molecule inhibitor A1210477 enhances S55476 activity and induces caspase 3/7 activation.**

- A. MTS assay confirming enhanced antiproliferative effect of BCL2 inhibitor S-55746 in combination with MCL-1 inhibitor A-1210477 in DLBCL cell lines. Cells were treated with increasing concentrations of S-55746 in the presence or absence of increasing concentration of A-1210477 for 48 hrs. All data points represent the means of triplicate experiments, with error bars indicating the S.E.M.
- B. Cells were treated with S-55746 (yellow) in the presence or absence of A-1210477 (green) for 18 hours before assessing caspase 3/7 activities by immunohistochemistry

**A**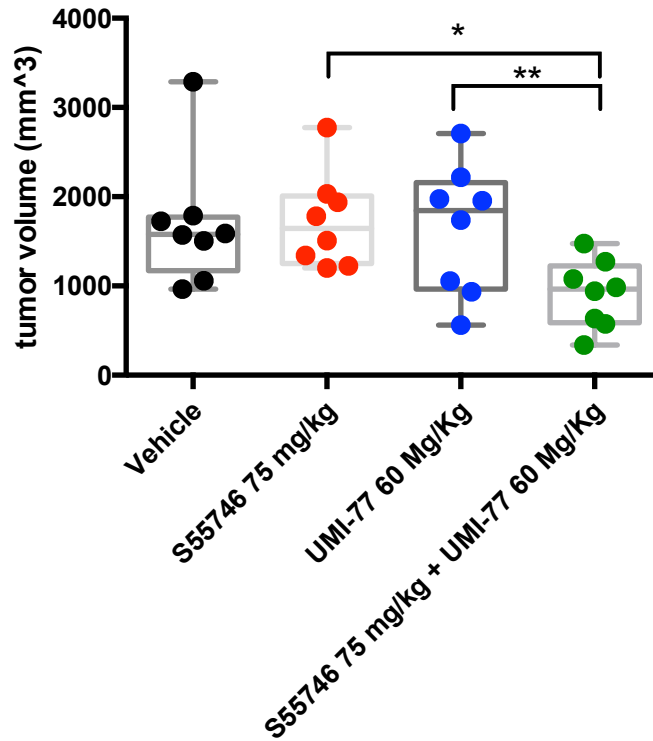**B**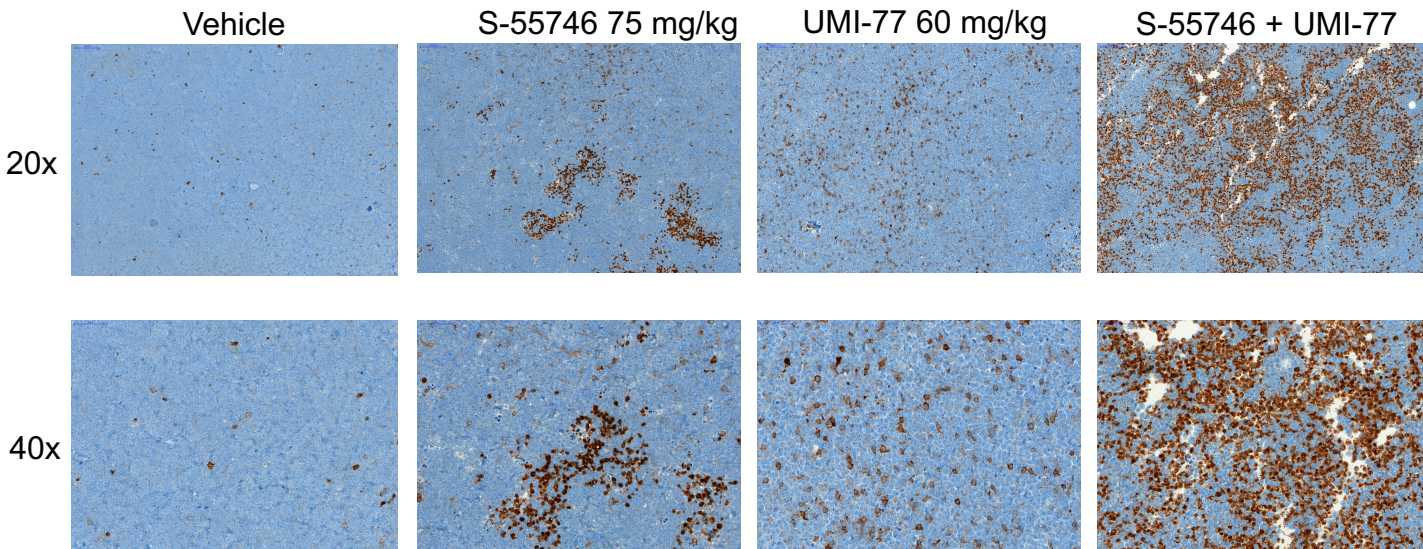

**Figure S7. The MCL1 small molecule inhibitor UMI-77 enhances the antiproliferative activity of the BCL2 inhibitor S-55746 in vivo**

- A. NSG mice (n = 8 per treatment group) bearing SUDHL-6 tumors were treated intravenously with either vehicle, S-55746 (75 mg/kg once a day), UMI-77 (60 mg/kg every other day) or the two drugs together for 3 weeks. Tumor volumes were measured 3 times per week. Differences between groups were calculated with the ANOVA with Dunnett's test. \*P < 0.05, \*\*P < 0.005.
- B. Immunohistochemistry staining showing cleaved caspase 3 protein expression in SUDHL-6 xenografts after administration of either vehicle, S-55746 at 75 mg/kg, UMI-77 at 60 mg/kg or the combination of the two drugs for 3 weeks.

Supplementary Figure 8

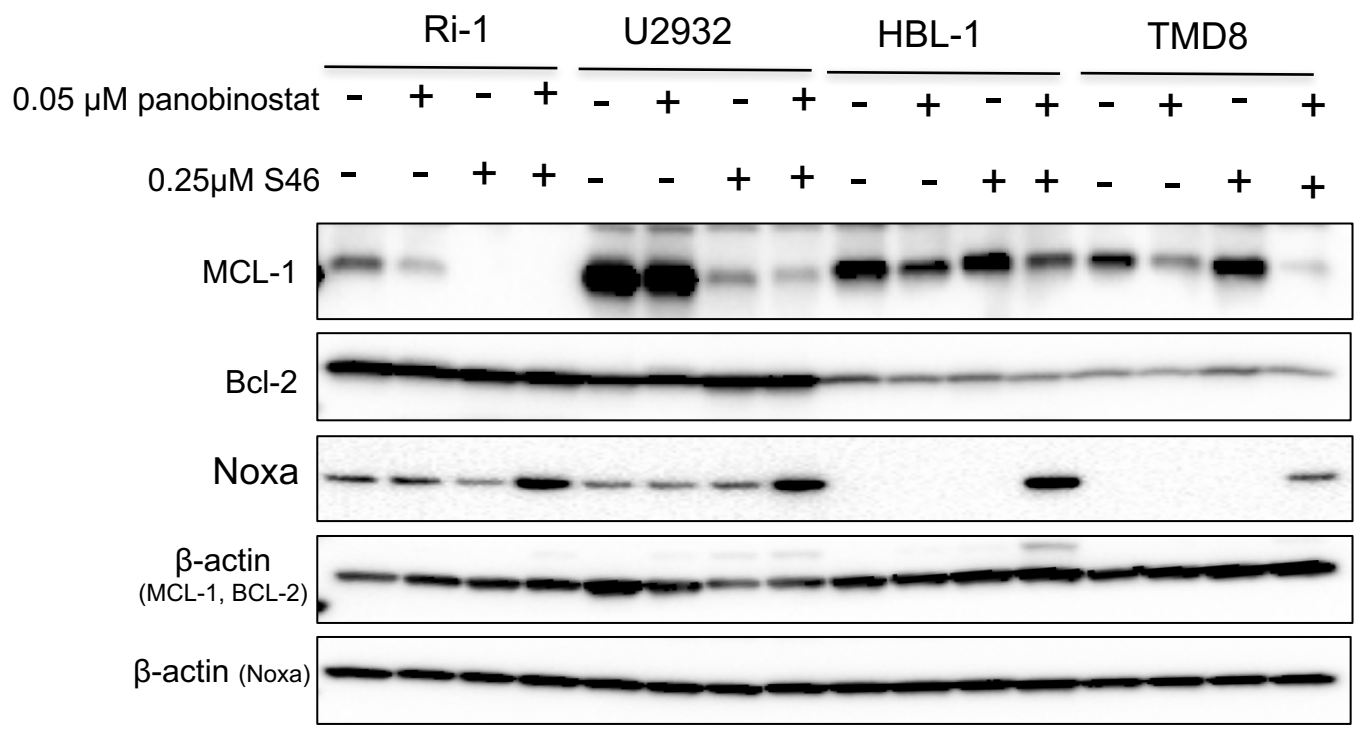

**Figure S8. Effect of S-55746 and panobinostat on MCL1 and NOXA protein levels in DLBCL.** Western blot showing enhanced decrease in MCL1 protein level and increase in NOXA protein level after treatment with the combination of panobinostat and S-55746 for 24 hours. The drug had no effect on BCL2 levels.



# Supplementary Figure 9

**A**

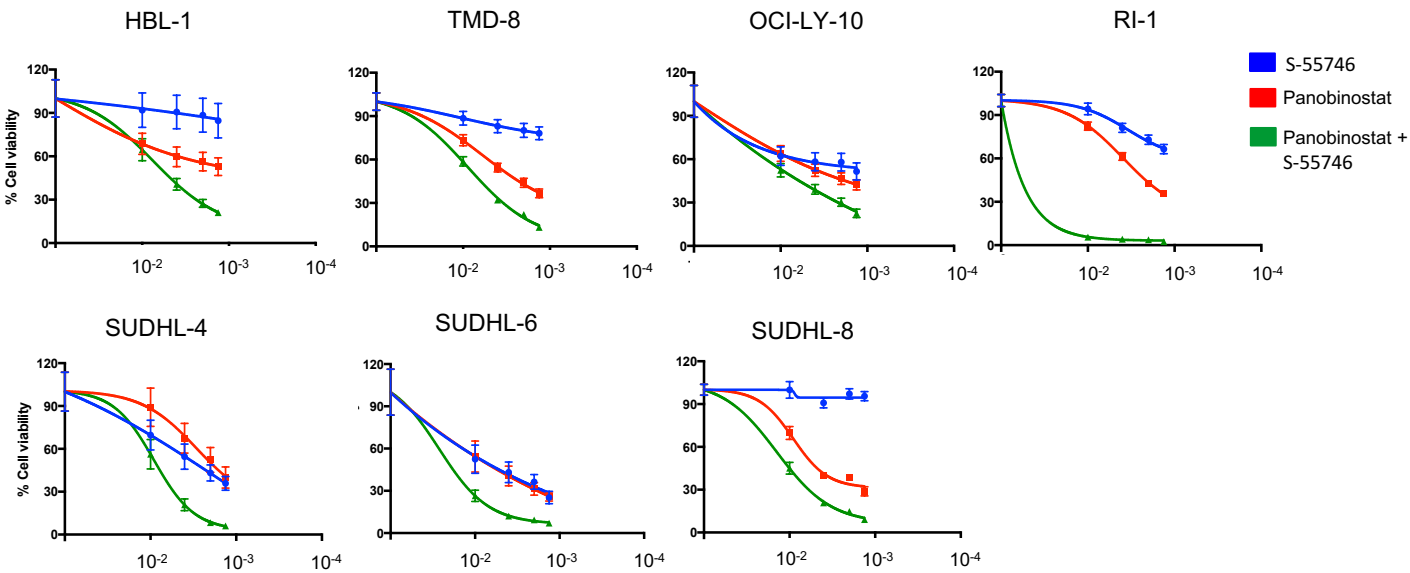

**B**

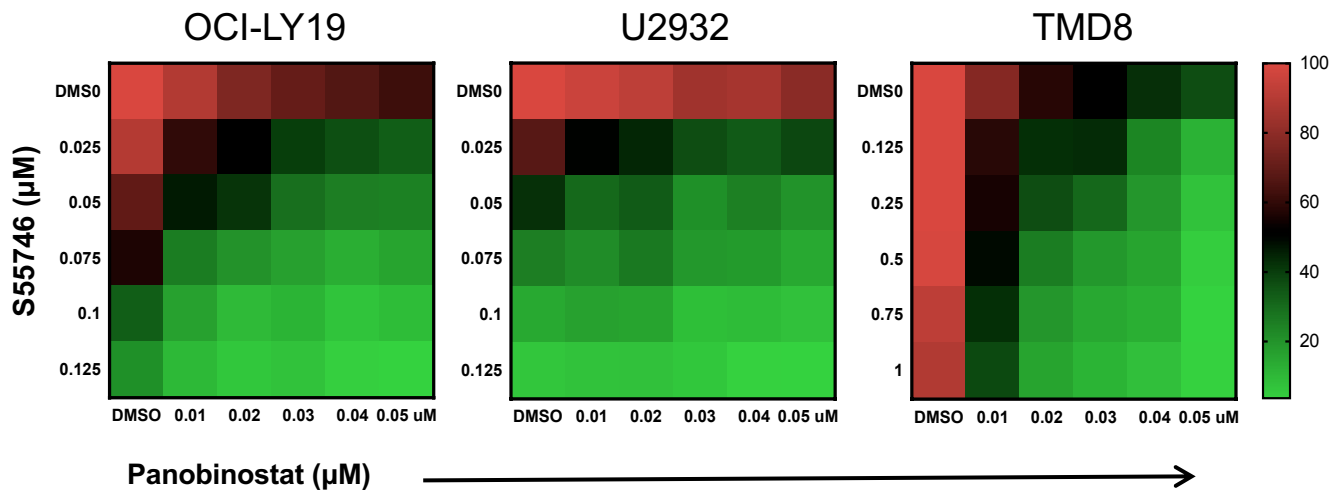

**Figure S9. Panobinostat enhances the antiproliferative activity of the BCL2 inhibitor S-55746 in DLBCL cell lines.**

- MTS assay confirming enhanced antiproliferative effects of S-55746 in combination with panobinostat in DLBCL cells.
- Heat maps showing synergistic effect of the combination of S-55746 and panobinostat in three representative DLBCL cells. Percentage of cell viability are depicted in a colorimetric scale from red (high) to green (low) normalize to DMSO (control). Values are the mean  $\pm$  SD of three separate determinations. Cells were incubated with increasing concentrations of S-55746 and panobinostat for 24 hours and cell viability was determined by Celltiter-Glo assay.

A

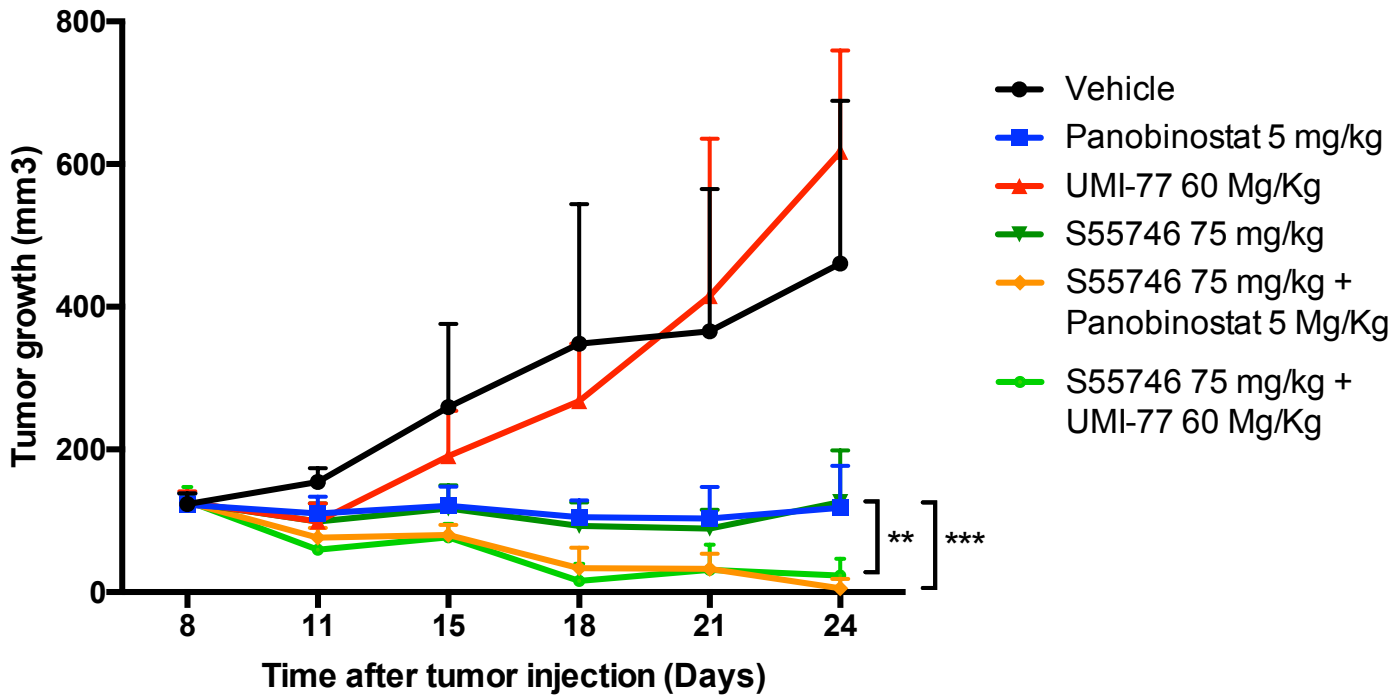

B

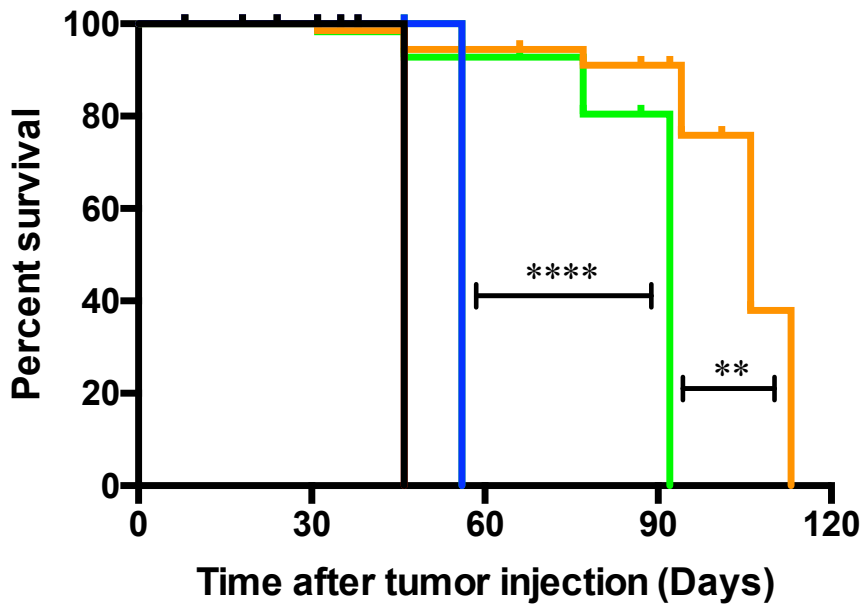

**Figure S10. S-55746 synergizes with panobinostat in PDX DLBCL xenograft model.**

- A. NSG mice (n = 8 per treatment group) were injected with PDX DLBCL and treated with either vehicle, panobinostat (5 mg/kg 5 times weekly), UMI-77 (60 mg/kg every other day), S-55746 (75 mg/kg 5 times weekly) or the 2 drugs together for 3 weeks. Differences between groups were calculated with the ANOVA with Dunnett's test. \*\*P < 0.005, \*\*\*P < 0.001
- B. Kaplan-Meier plot of the percent survival as a function of time from last drug administration. Data are from n = 8 for all groups in PDX DLBCL tumors. \*\*P < 0.005, \*\*\*\*P < 0.0001.

# Supplementary Figure 11

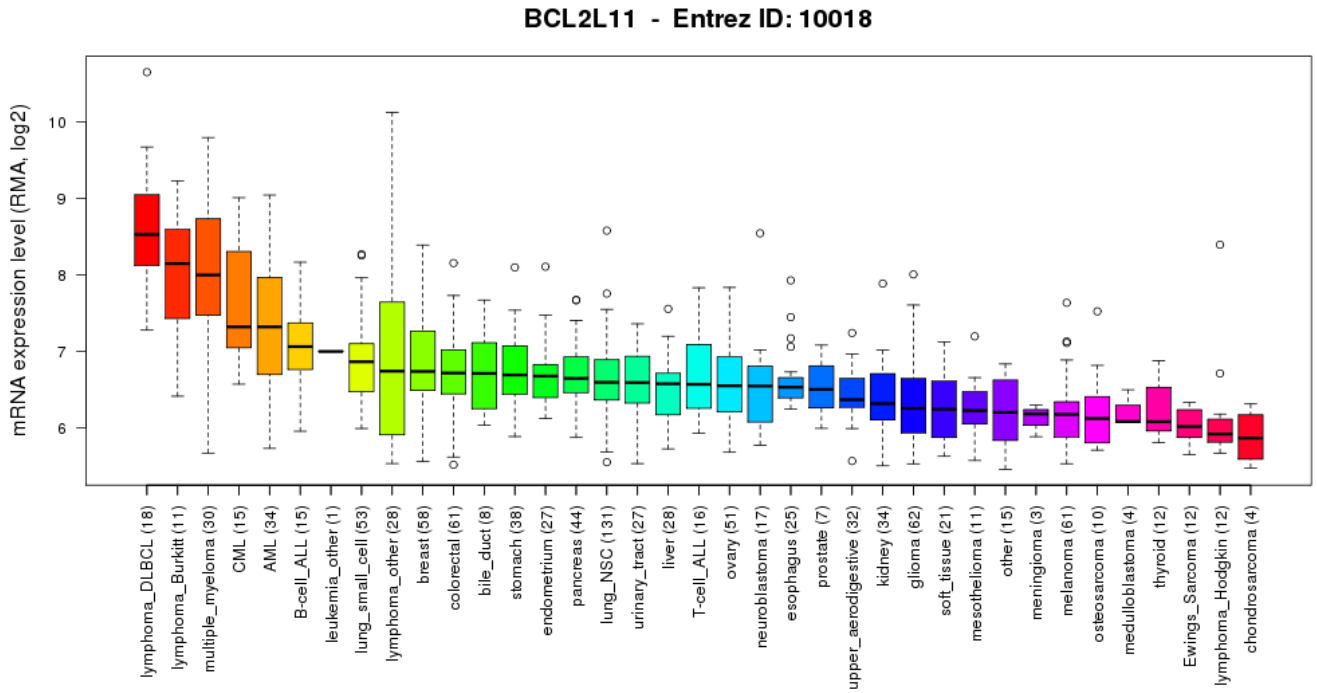

**Figure S11.** Publicly available BCL2L11 (encoding Bim) mRNA expression data archived in Cancer Cell Line Encyclopedia (<http://www.broadinstitute.org/ccle/home>).
